# Supplementary material for: Sheet-on-belt branched TiO2(B)/rGO powders with enhanced photocatalytic activity
Source: publisher site journal article supplement (doi:10.3762/bjnano.9.146), 2018-05-24
Supplement: Additional file 1 [file 2190-4286-9-146-S1.pdf]

**Supporting Information**  
**for**  
**Sheet-on-belt branched TiO<sub>2</sub>(B)/rGO powders**  
**with enhanced photocatalytic activity**

Huan Xing<sup>1</sup>, Wei Wen<sup>1,2</sup> and Jin-Ming Wu<sup>\*1</sup>

Address: <sup>1</sup>State Key Laboratory of Silicon Materials, and School of Materials Science and Engineering, Zhejiang University, Hangzhou 310027, P. R. China and <sup>2</sup>College of Mechanical and Electrical Engineering, Hainan University, Haikou 570228, P. R. China

Email: Jin-Ming Wu - msewjw@zju.edu.cn

\* Corresponding author

**Additional FESEM images, low-temperature N<sub>2</sub> adsorption isotherms and photodegradation results to support the discussion**

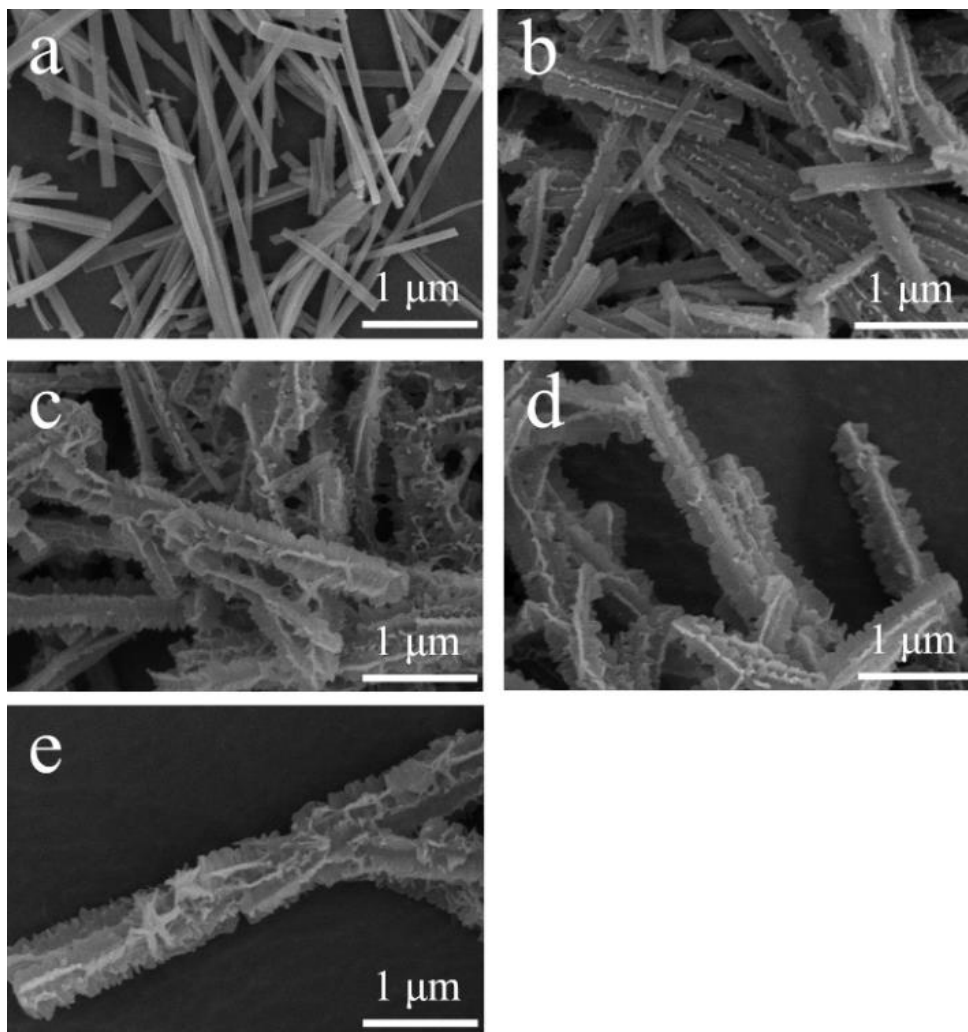

**Figure S1:** FESEM images of TGN-branches achieved by immersing in the precursor solution for (a) 0 h, (b) 2 h, (c) 4 h, (d) 6 h and (e) 8 h.

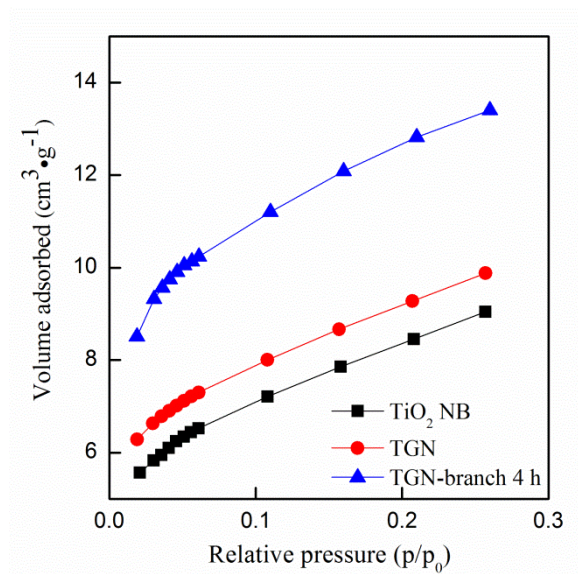

**Figure S2:** The low-temperature  $\text{N}_2$  adsorption isotherms of the pristine  $\text{TiO}_2$  nanobelt ( $\text{TiO}_2 \text{ NB}$ ), TGN and TGN-branch 4 h.

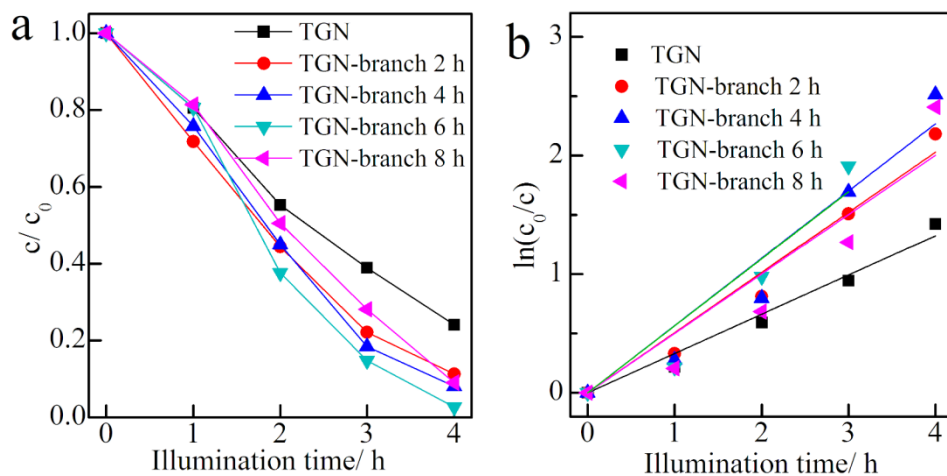

**Figure S3:** Photodegradations of phenol in the presence of TGN and TGN-branches achieved by immersing in the precursor solution for various durations, under UV light illumination: (a) the degradation curves; (b) the fitting results assuming a pseudo-first order reaction.
